# Supplementary material
Source: publisher figshare collection journal article supplement (https://sage.figshare.com/ndownloader/files/17961749)
Supplement: Supplementary file 1 [file 17961749]

FAI-19-0261.R4 – Reported Author Disclosures

Assessment of deltoid ligament integrity in ankle fractures: ultrasonography imaging analysis

The author(s) declared no potential conflicts of interest with respect to the research, authorship, and/or publication of this article. ICMJE forms for all authors are available online.
